# Supplementary material for: Selective Oxidation of Glycerol via Acceptorless Dehydrogenation Driven by Ir(I)-NHC Catalysts
Source: MDPI journal article supplement (doi:10.3390/molecules27227666), 2022-11-08
Supplement: s1 [file s1]

# Supporting Information

## Selective Oxidation of Glycerol via Acceptorless Dehydrogenation Driven by Ir(I)-NHC Catalysts

*M. Victoria Jiménez\* Ana I. Ojeda-Amador, Raquel Puerta-Oteo, Joaquín Martínez-Sal, Vincenzo Passarelli, and Jesús J. Pérez-Torrente\**

Departamento de Química Inorgánica, Instituto de Síntesis Química y Catálisis Homogénea-ISQCH, Universidad de Zaragoza-C.S.I.C., 50009-Zaragoza, Spain.

Contents:

1. Selected NMR, IR and HRMS spectra of iridium(I) compounds **1-9**.
2.  $^1\text{H}$  NMR analysis representative of a catalysis test in the standard reaction conditions.

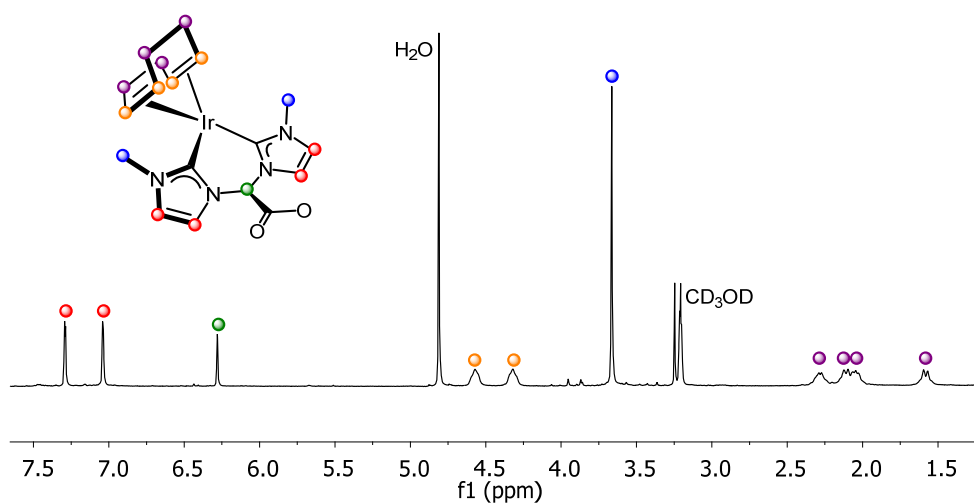

**Figure S1.**  $^1\text{H}$  NMR of  $[\text{Ir}(\text{cod})\{(\text{MeIm})_2\text{CHCOO}\}]$  (**1**) ( $\text{CD}_3\text{OD}$ , 298K).

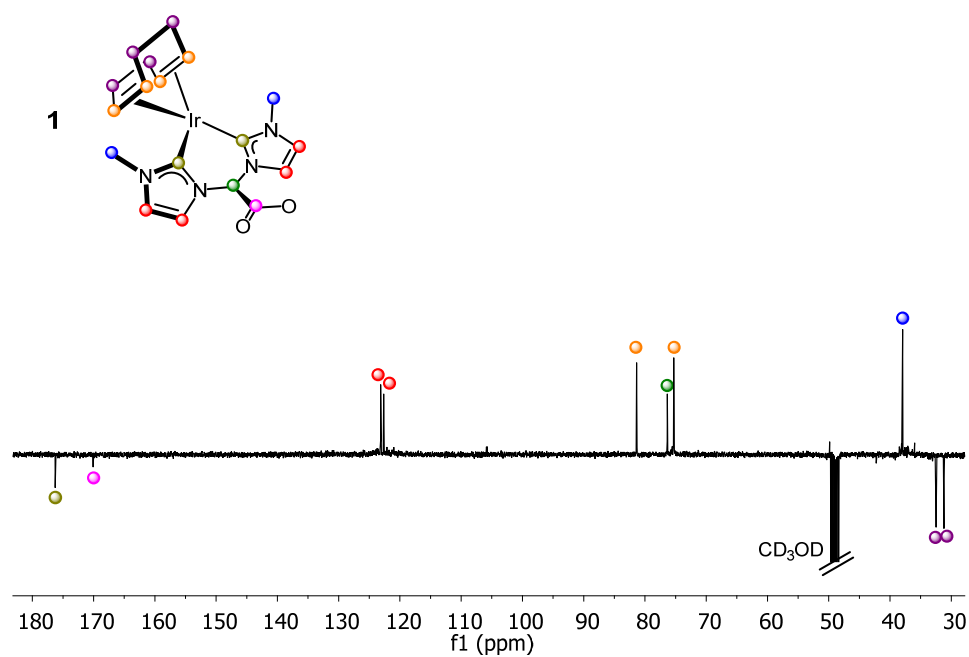

**Figure S2.** <sup>13</sup>C{<sup>1</sup>H}-APT NMR of [Ir(cod){(MeIm)<sub>2</sub>CHCOO}] (**1**) (CD<sub>3</sub>OD, 298K).

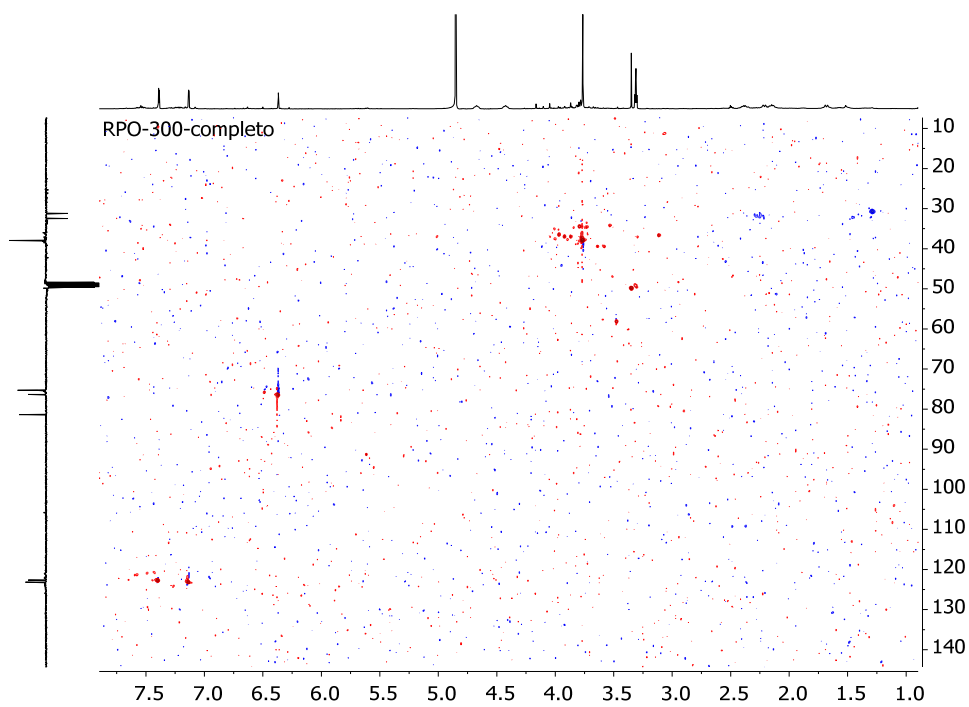

**Figure S3.** <sup>1</sup>H, <sup>13</sup>C-HSQC NMR of [Ir(cod){(MeIm)<sub>2</sub>CHCOO}] (**1**) (CD<sub>3</sub>OD, 298K).

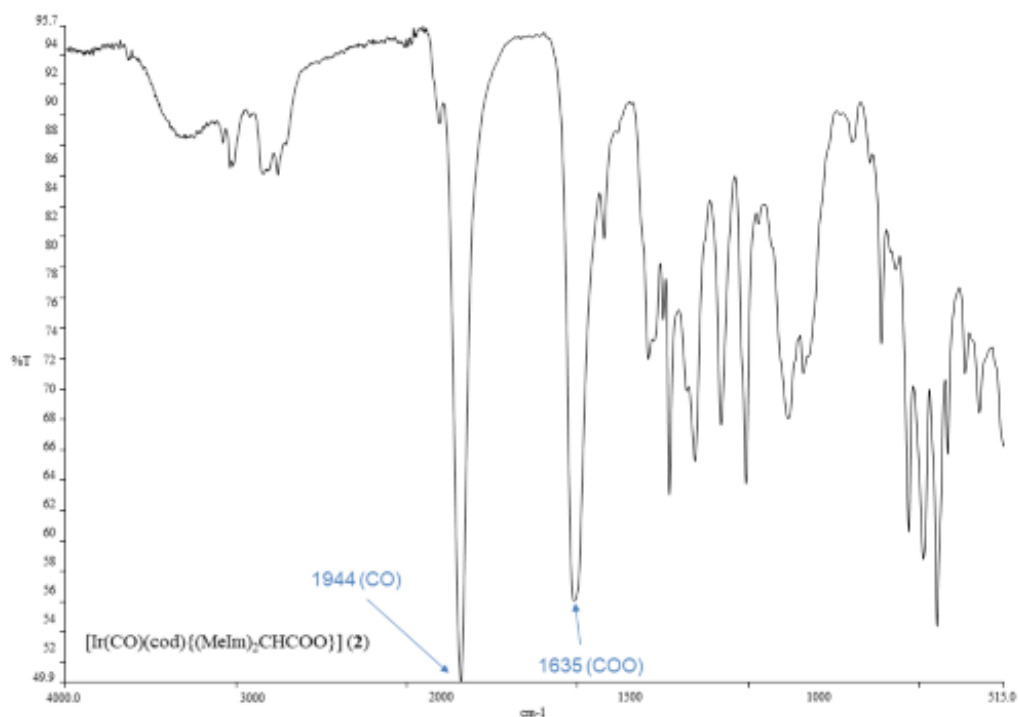

**Figure S4.** IR spectrum of  $[\text{Ir}(\text{CO})(\text{cod})\{(\text{MeIm})_2\text{CHCOO}\}]$  (**2**) (nujol suspension).

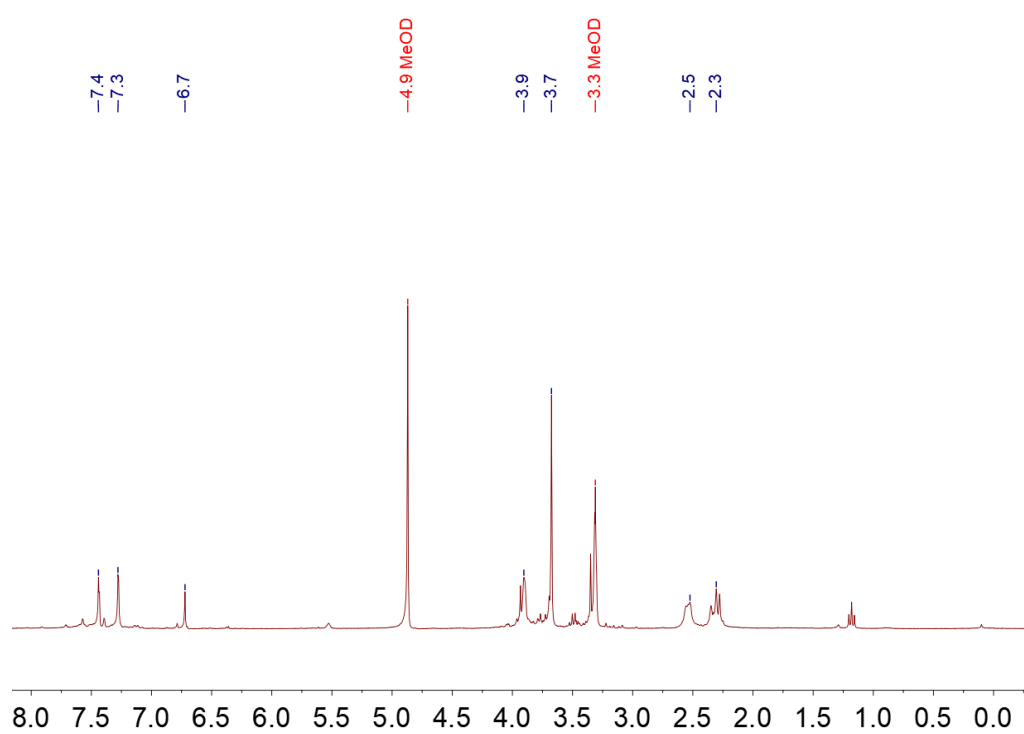

**Figure S5.**  $^1\text{H}$  NMR of  $[\text{Ir}(\text{CO})(\text{cod})\{(\text{MeIm})_2\text{CHCOO}\}]$  (**2**) ( $\text{CD}_3\text{OD}$ , 298K).

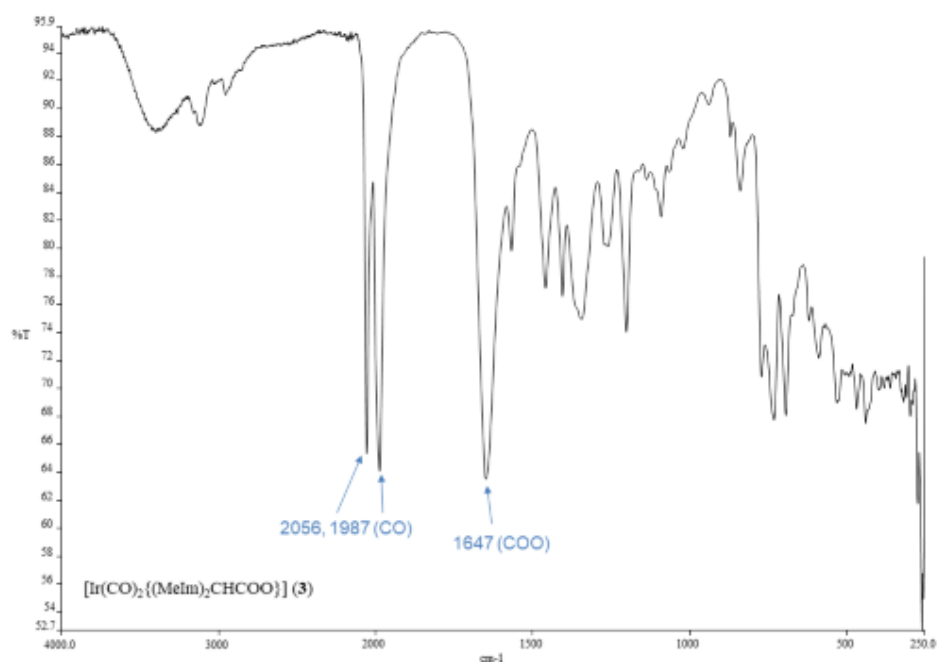

**Figure S6.** IR spectrum of  $[\text{Ir}(\text{CO})_2\{(\text{MeIm})_2\text{CHCOO}\}]$  (**3**) (nujol suspension).

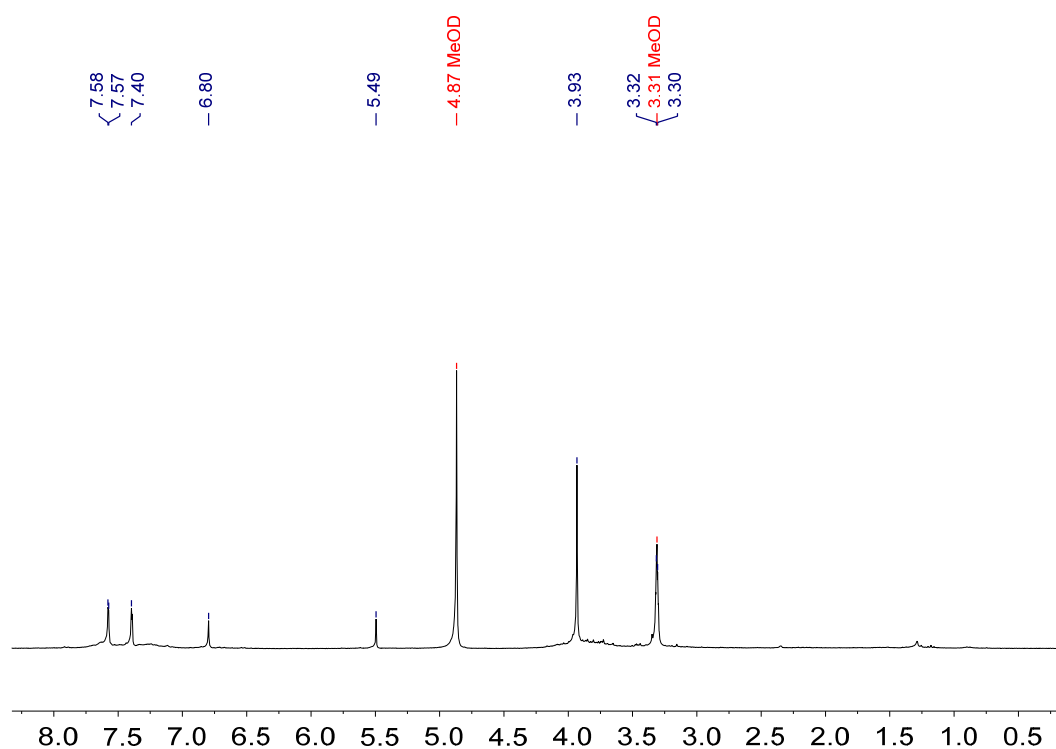

**Figure S7.**  $^1\text{H}$  NMR of  $[\text{Ir}(\text{CO})_2\{(\text{MeIm})_2\text{CHCOO}\}]$  (**3**) ( $\text{CD}_3\text{OD}$ , 298K).

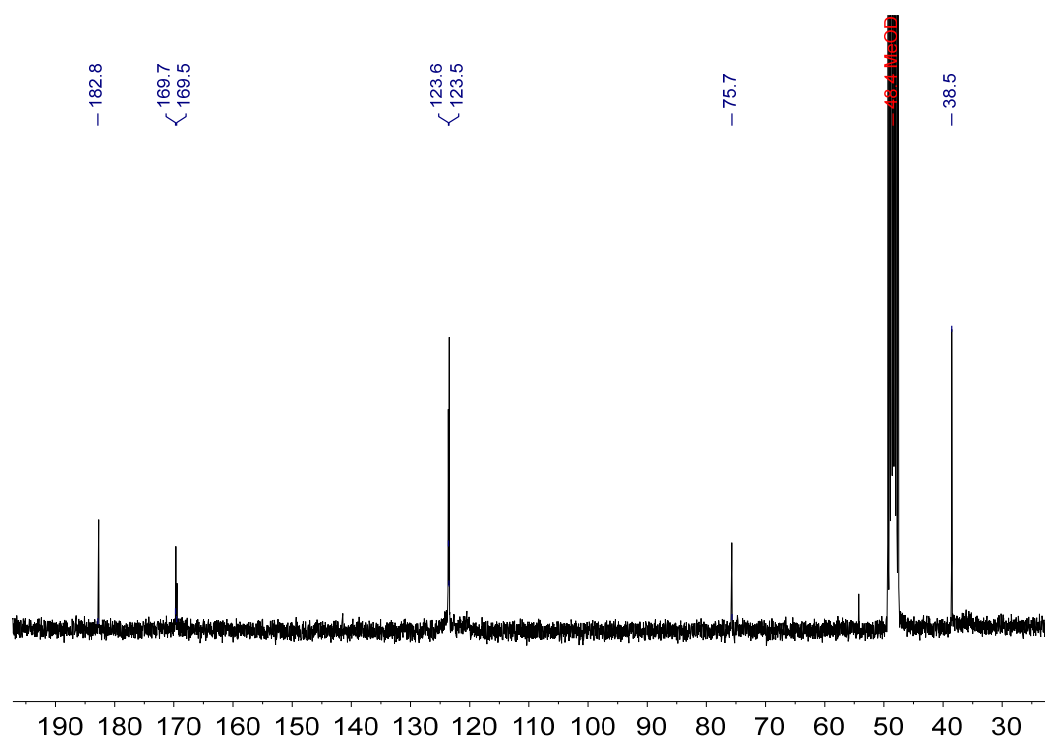

**Figure S8.**  $^{13}\text{C}\{^1\text{H}\}$  NMR of compound  $[\text{Ir}(\text{CO})_2\{(\text{MeIm})_2\text{CHCOO}\}]$  (**3**) ( $\text{CD}_3\text{OD}$ , 298K).

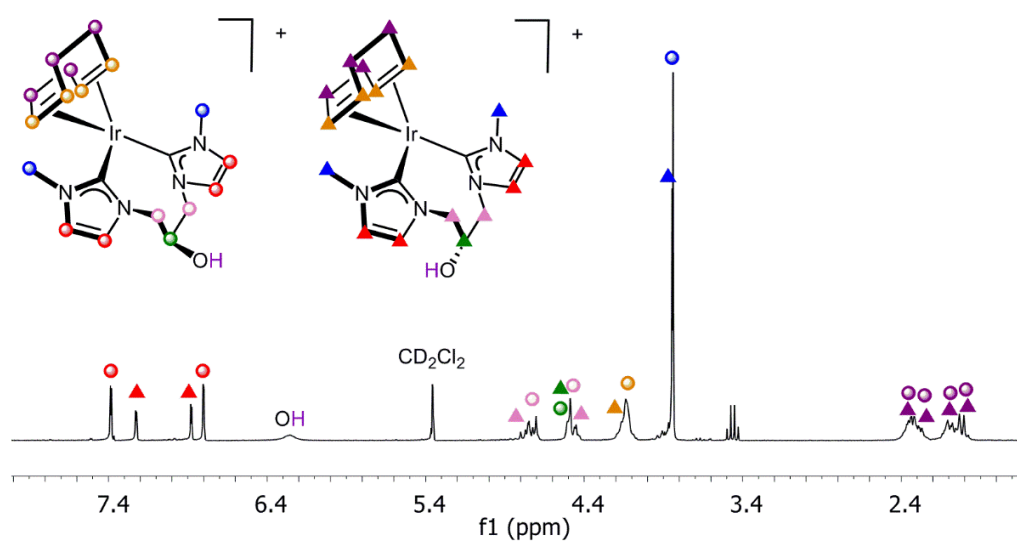

**Figure S9.**  $^1\text{H}$  NMR of  $[\text{Ir}(\text{cod})\{(\text{MeImCH}_2)_2\text{CHOH}\}]\text{Br}$  (**4**) ( $\text{CD}_2\text{Cl}_2$ , 298K) showing the presence of two isomers.

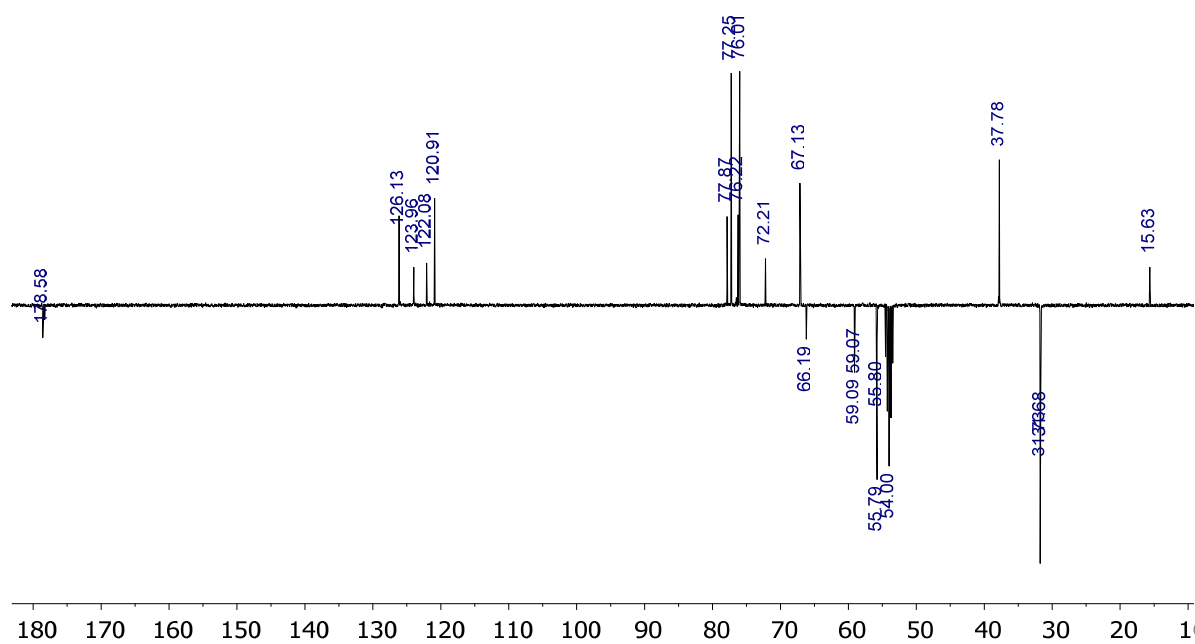

**Figure S10.**  $^{13}\text{C}\{^1\text{H}\}$ -APT NMR of  $[\text{Ir}(\text{cod})\{(\text{MeImCH}_2)_2\text{CHOH}\}]\text{Br}$  (**4**) ( $\text{CD}_2\text{Cl}_2$ , 298K).

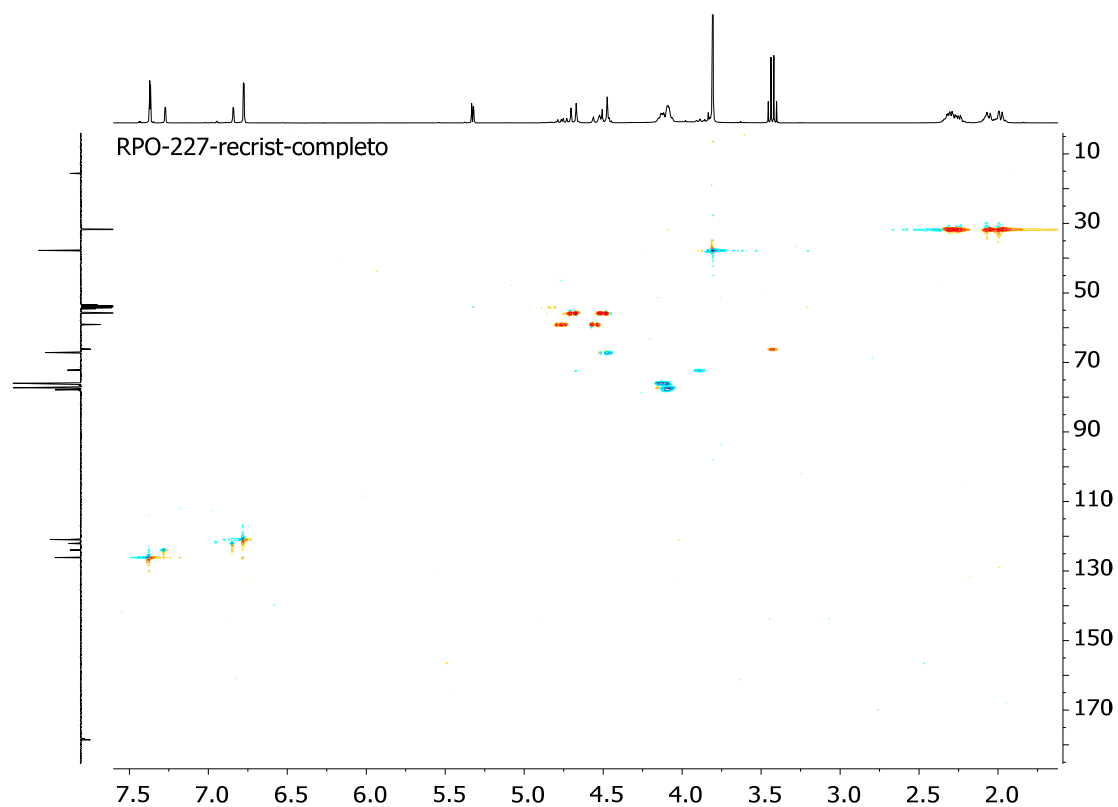

**Figure S11.**  $^1\text{H}$ ,  $^{13}\text{C}$ -HSQC NMR of  $[\text{Ir}(\text{cod})\{(\text{MeImCH}_2)_2\text{CHOH}\}]\text{Br}$  (**4**) ( $\text{CD}_2\text{Cl}_2$ , 298K).

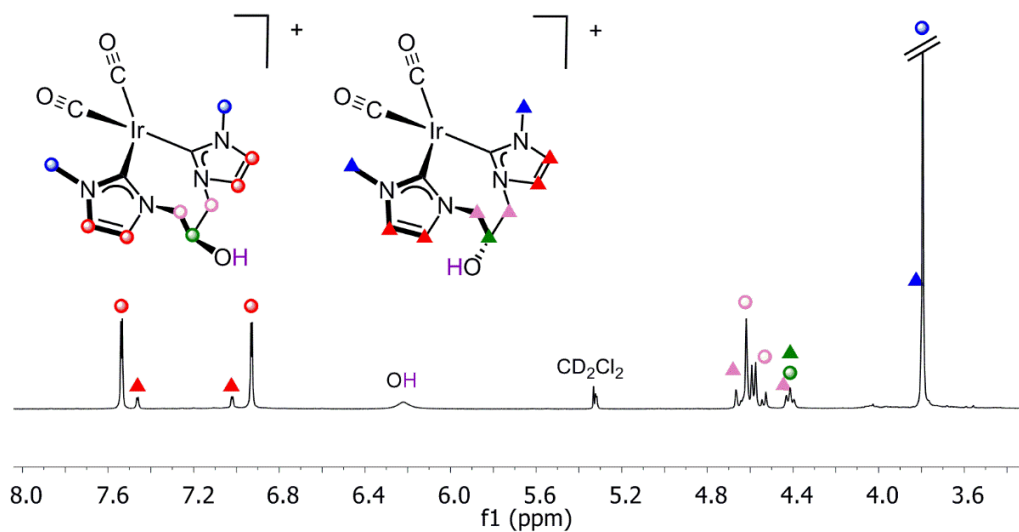

**Figure S12.**  $^1\text{H}$  NMR of  $[\text{Ir}(\text{CO})_2\{(\text{MeImCH}_2)_2\text{CHOH}\}]\text{Br}$  (**5**) ( $\text{CD}_2\text{Cl}_2$ , 298K) showing the presence of two isomers.

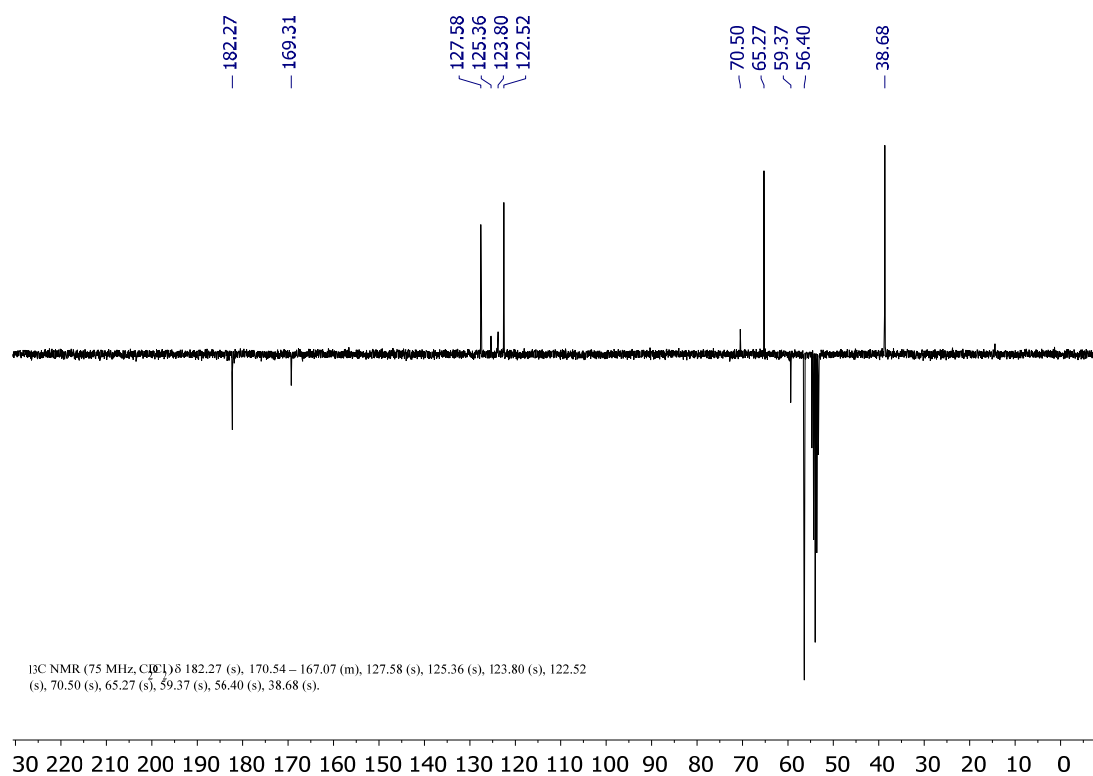

**Figure S13.**  $^{13}\text{C}\{^1\text{H}\}$ -APT NMR of  $[\text{Ir}(\text{CO})_2\{(\text{MeImCH}_2)_2\text{CHOH}\}]\text{Br}$  (**5**) ( $\text{CD}_2\text{Cl}_2$ , 298K).

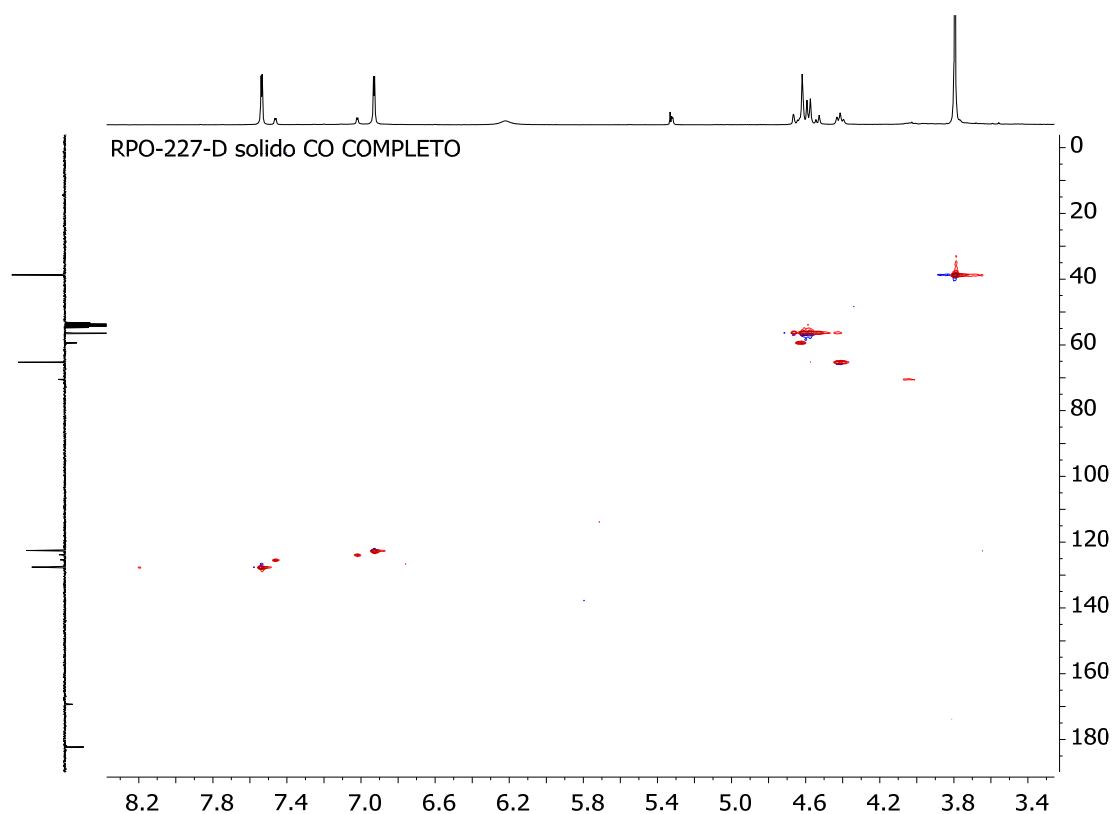

**Figure S14.**  $^1\text{H}$ ,  $^{13}\text{C}$ -HSQC NMR of  $[\text{Ir}(\text{CO})_2\{(\text{MeImCH}_2)_2\text{CHOH}\}]\text{Br}$  (**5**) ( $\text{CD}_2\text{Cl}_2$ , 298K).

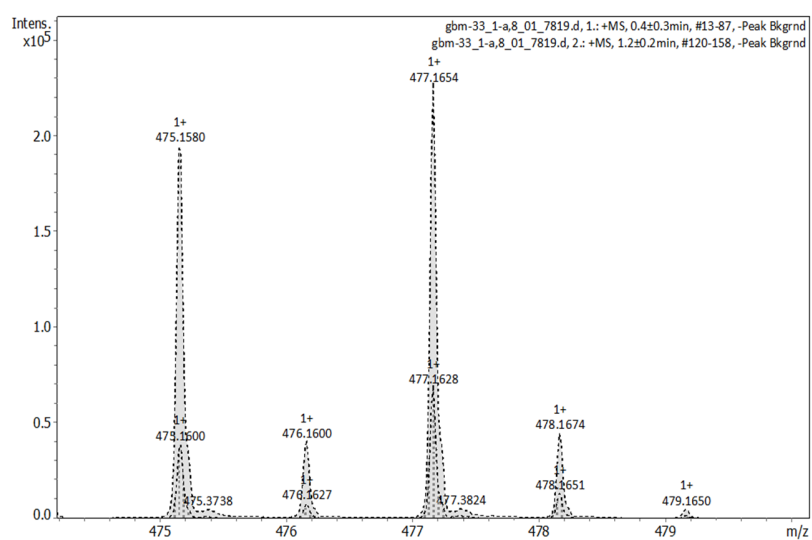

**Figure S15.** ESI+ mass spectrum of  $[\text{Ir}(\text{cod})\{(\text{MeIm})_2\text{CH}_2\}]\text{I}$  (**6**) ( $\text{CH}_2\text{Cl}_2$ ).



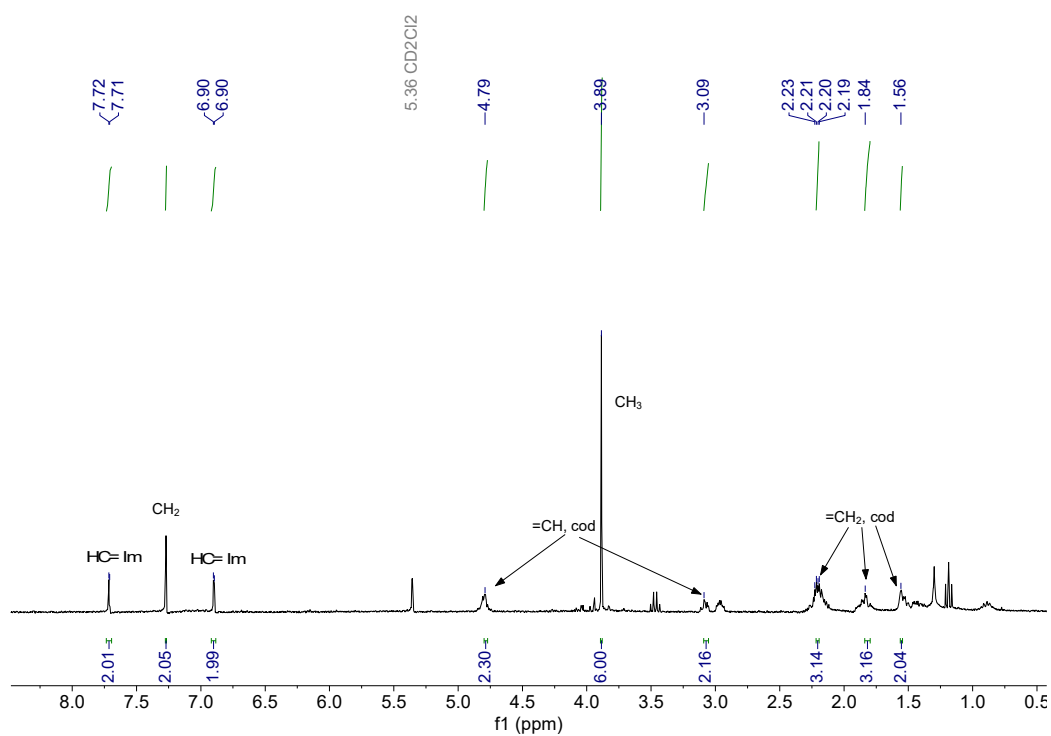

**Figure S16.**  $^1\text{H}$  NMR of compound  $[\text{Ir}(\text{cod})\{(\text{MeIm})_2\text{CH}_2\}]\text{I}$  (**6**) ( $\text{CD}_2\text{Cl}_2$ , 298K).

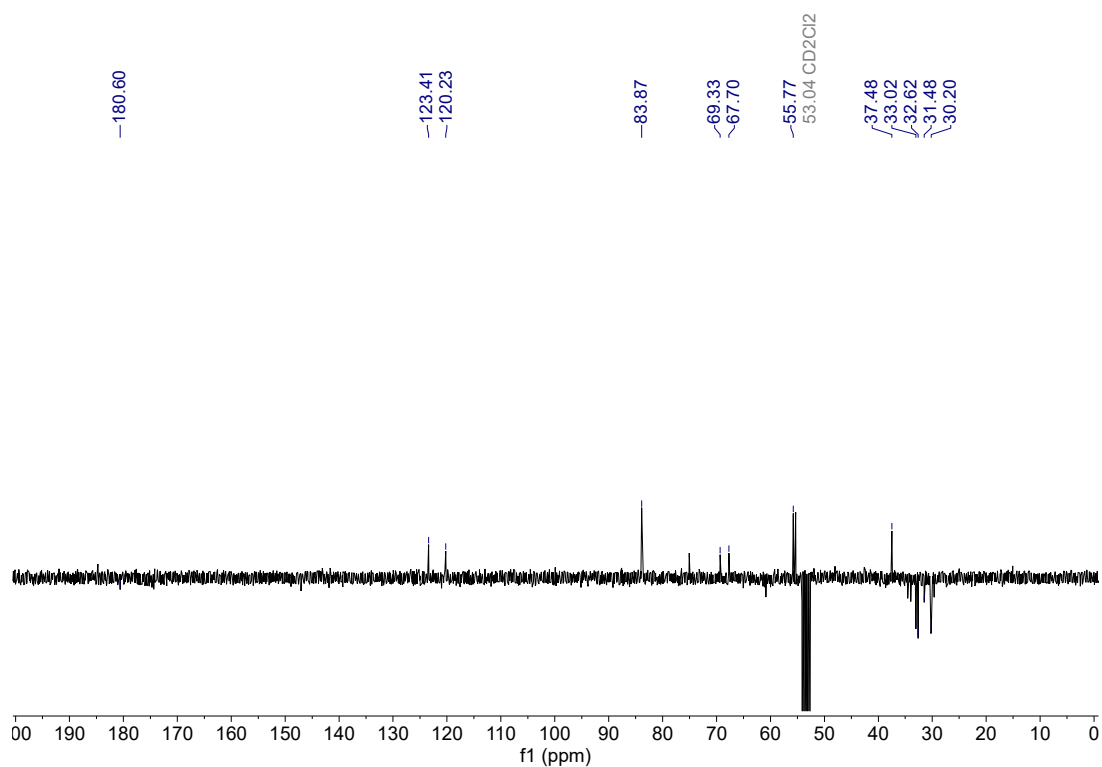

**Figure S17.**  $^{13}\text{C}\{^1\text{H}\}$ -APT NMR of  $[\text{Ir}(\text{cod})\{(\text{MeIm})_2\text{CH}_2\}]\text{I}$  (**6**) ( $\text{CD}_2\text{Cl}_2$ , 298K).

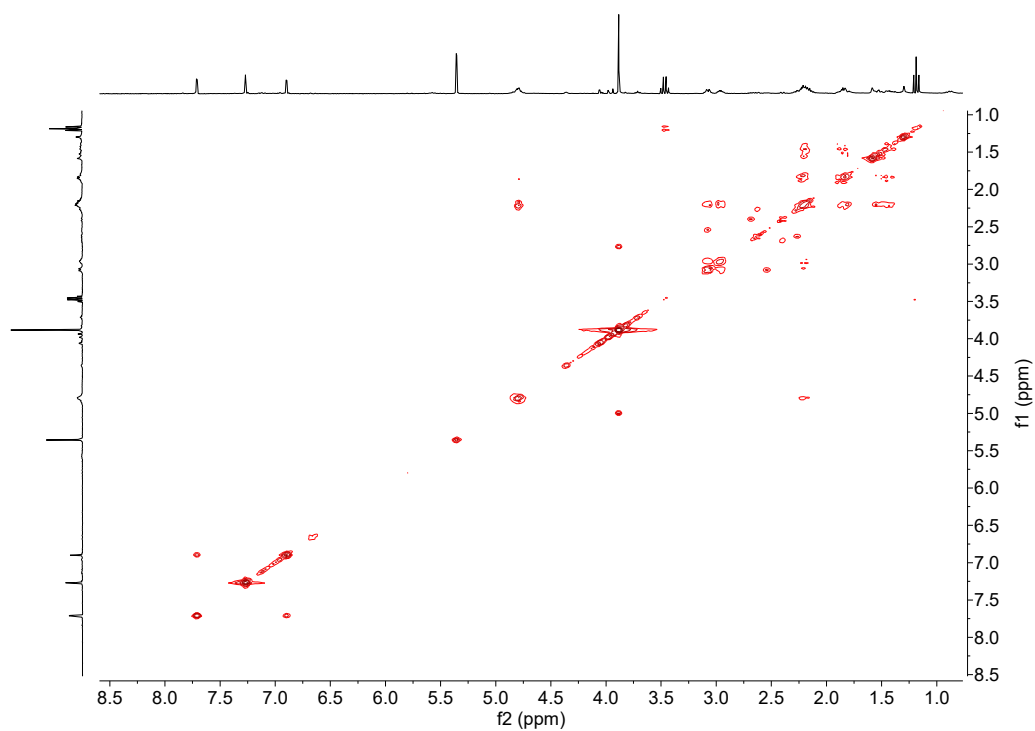

**Figure S18.**  $^1\text{H}$ ,  $^1\text{H}$ -COSY NMR of  $[\text{Ir}(\text{cod})\{(\text{MeIm})_2\text{CH}_2\}]\text{I}$  (**6**) ( $\text{CD}_2\text{Cl}_2$ , 298K).

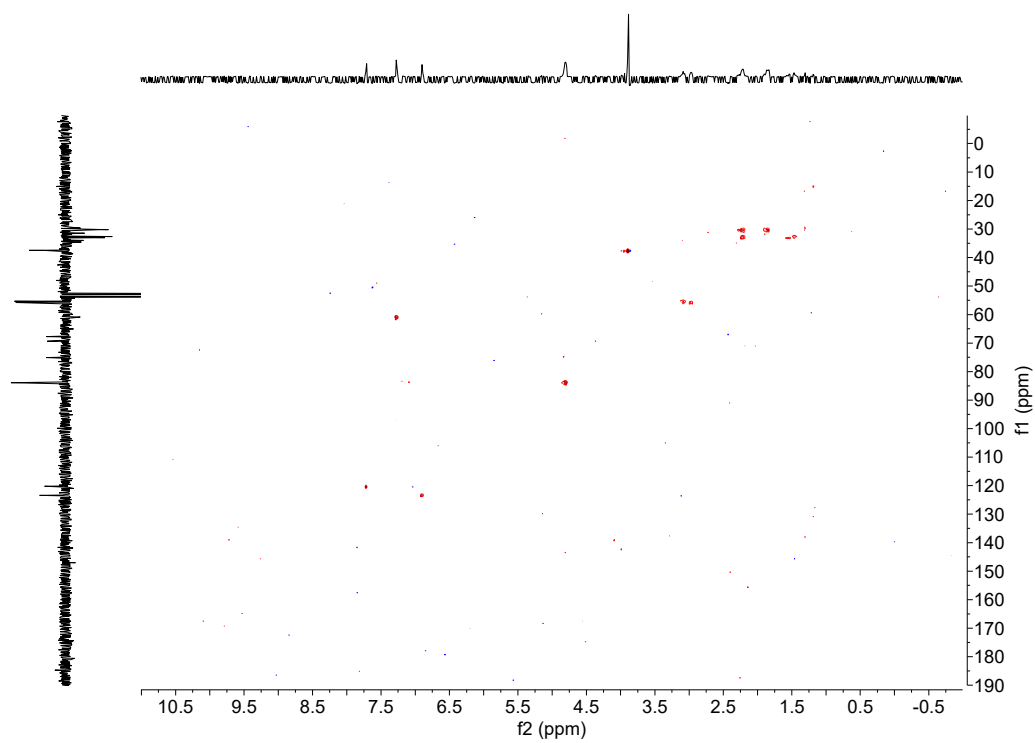

**Figure S19.**  $^1\text{H}$ ,  $^{13}\text{C}$ -HSQC NMR of  $[\text{Ir}(\text{cod})\{(\text{MeIm})_2\text{CH}_2\}]\text{I}$  (**6**) ( $\text{CD}_2\text{Cl}_2$ , 298K).

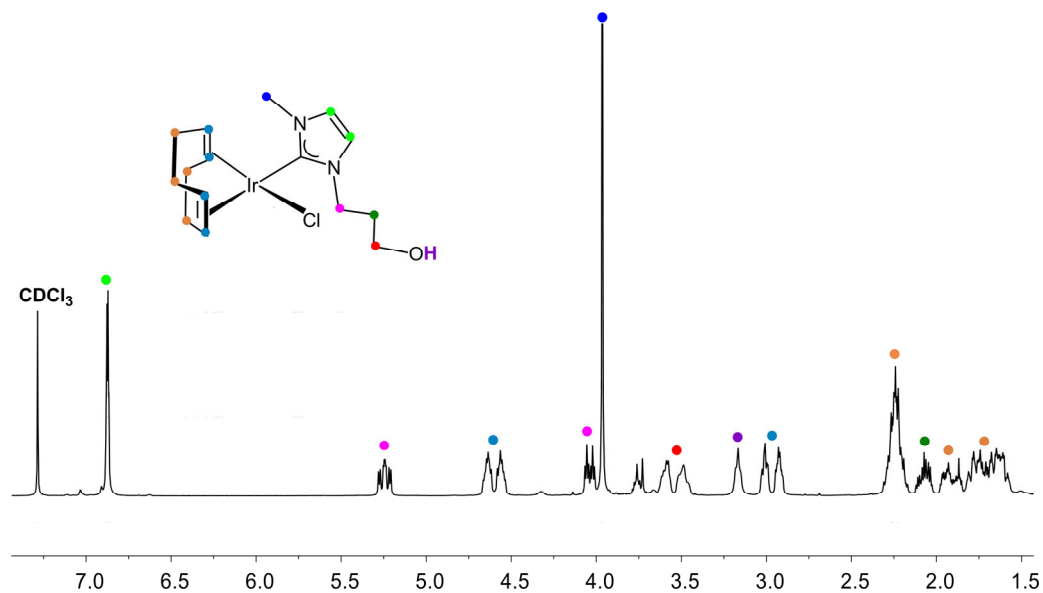

**Figure S20.**  $^1\text{H}$  NMR of  $[\text{IrCl}(\text{cod})\{\text{MeIm}(\text{CH}_2)_3\text{OH}\}]$  (7) ( $\text{CDCl}_3$ , 298K).

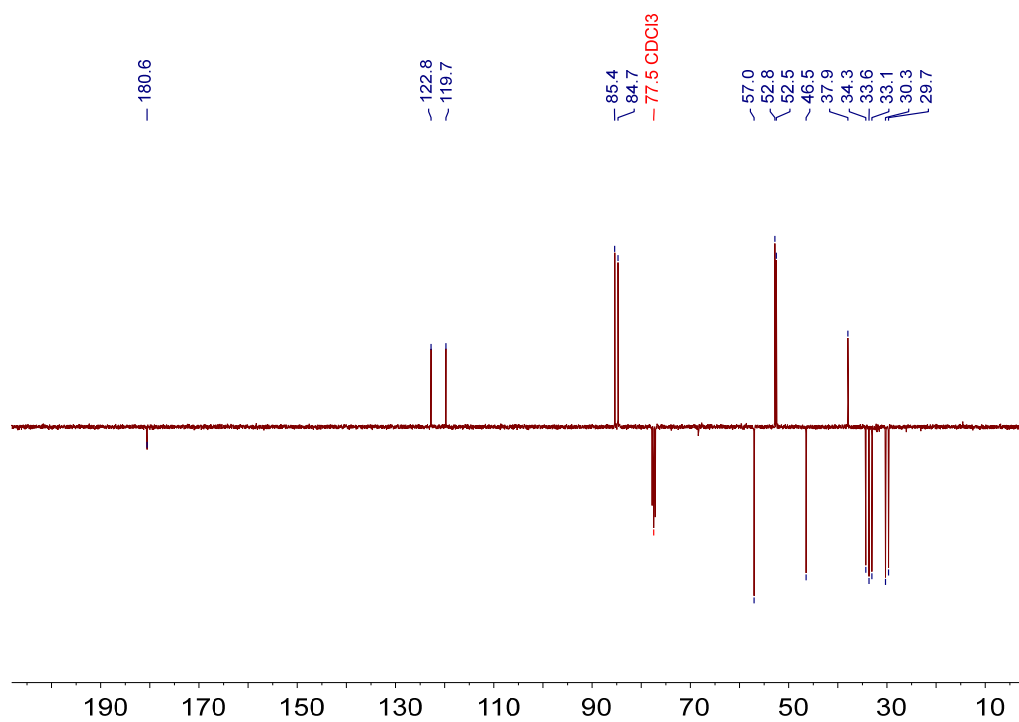

**Figure S21.**  $^{13}\text{C}\{^1\text{H}\}$ -APT NMR of  $[\text{IrCl}(\text{cod})\{\text{MeIm}(\text{CH}_2)_3\text{OH}\}]$  (7) ( $\text{CDCl}_3$ , 298K).

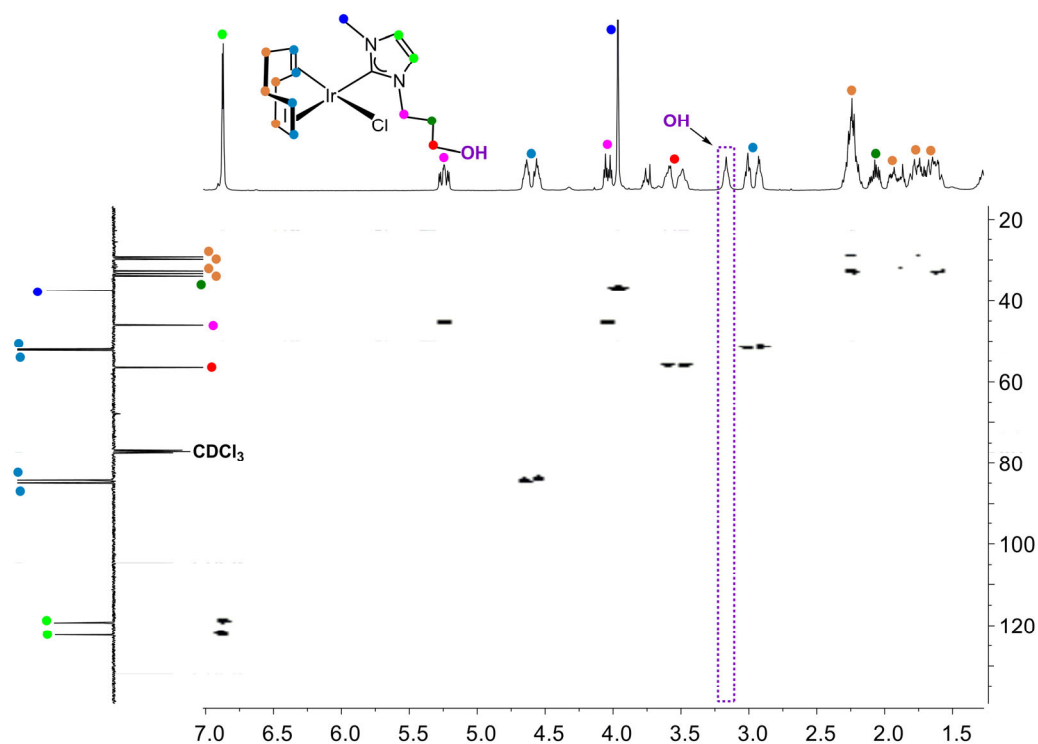

**Figure S22.**  $^1\text{H}$ ,  $^{13}\text{C}$ -HSQC NMR of  $[\text{IrCl}(\text{cod})\{\text{MeIm}(\text{CH}_2)_3\text{OH}\}]$  (**7**) ( $\text{CDCl}_3$ , 298K).

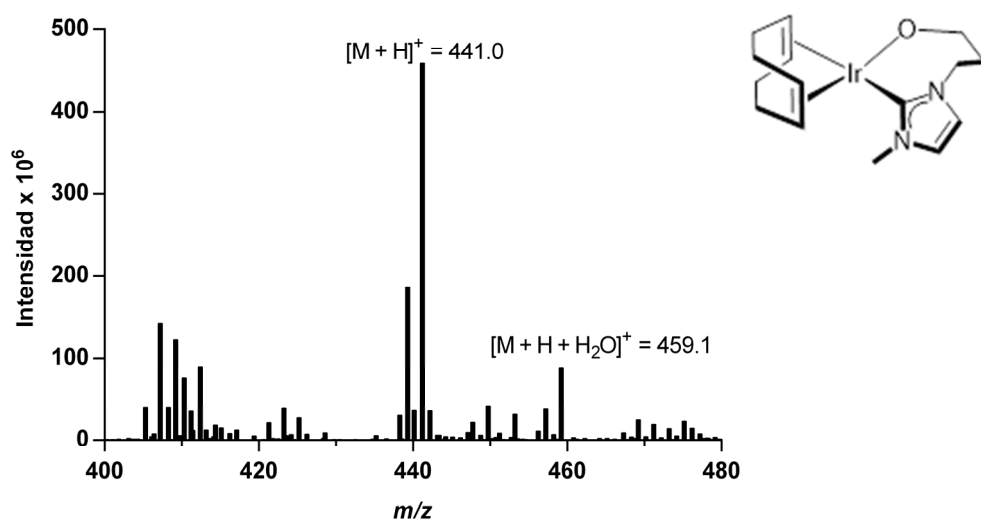

**Figure S23.** MALDI-Tof mass spectrum of  $[\text{Ir}(\text{cod})\{\kappa^2\text{-C,O-}\{\text{MeIm}(\text{CH}_2)_3\text{O}\}\}]$  (**8**) (toluene).

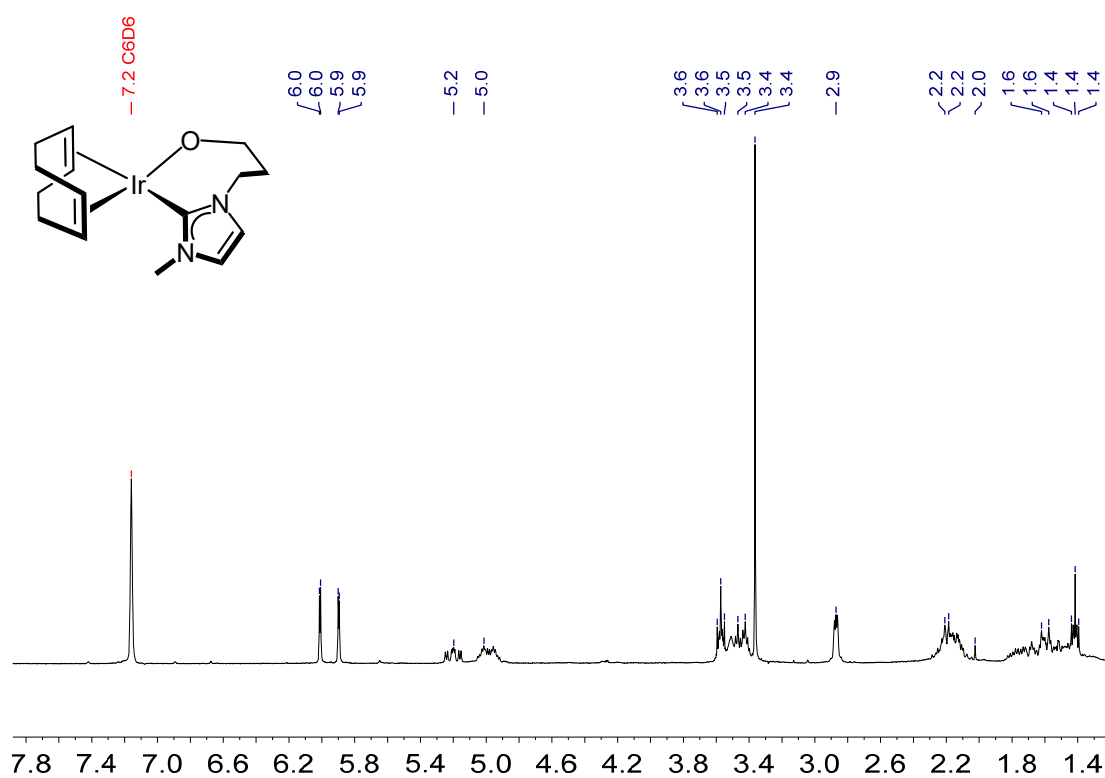

**Figure S24.**  $^1\text{H}$  NMR of  $[\text{Ir}(\text{cod})\{\kappa^2\text{-C,O-}\{\text{MeIm}(\text{CH}_2)_3\text{O}\}\}]$  (8) ( $\text{C}_6\text{D}_6$ , 298K).

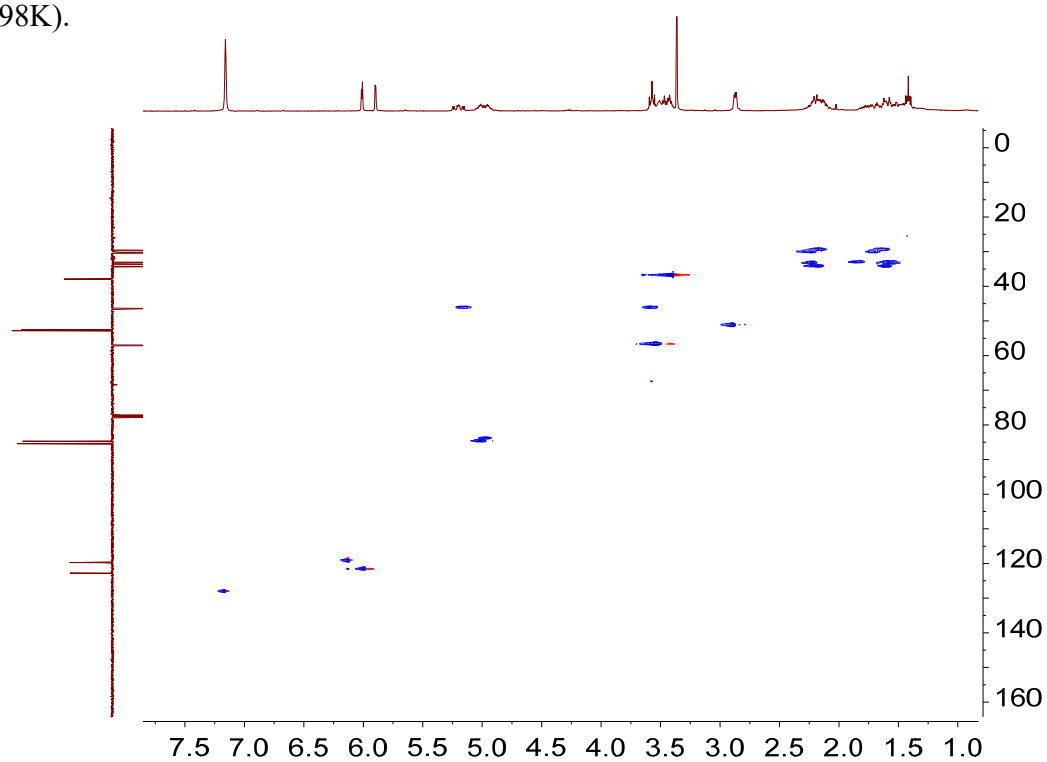

**Figure S25.**  $^1\text{H}$ ,  $^{13}\text{C}$ -HSQC NMR of  $[\text{Ir}(\text{cod})\{\kappa^2\text{-C,O-}\{\text{MeIm}(\text{CH}_2)_3\text{O}\}\}]$  (8) ( $\text{C}_6\text{D}_6$ , 298K).

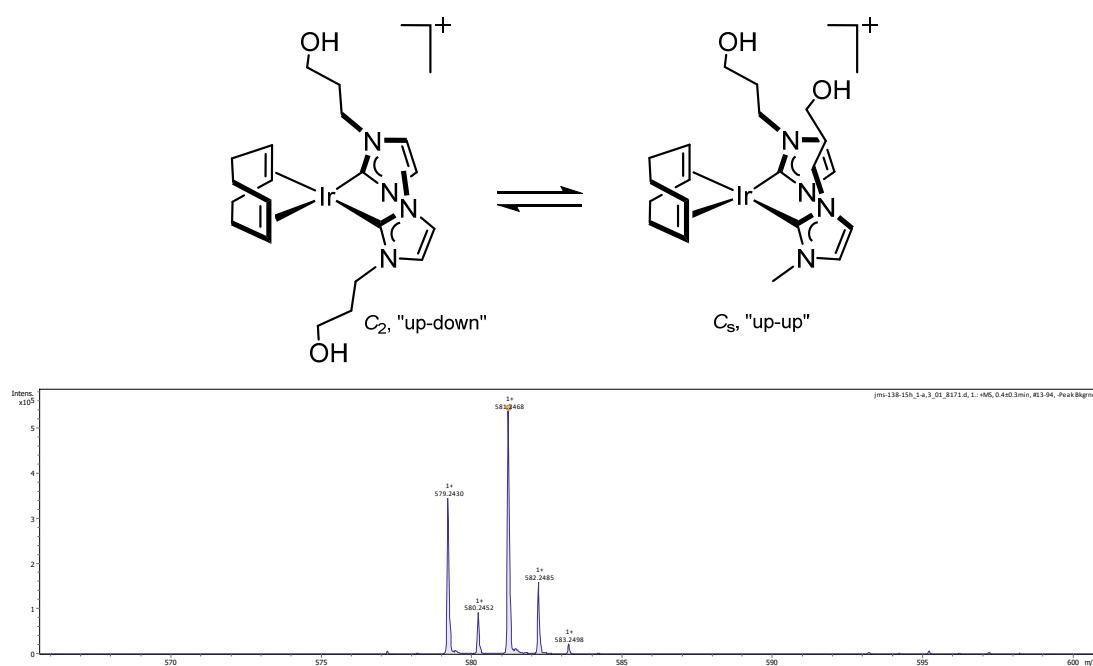

**Figure S26.** HRMS (ESI<sup>+</sup>, MeOH) of compound  $[\text{Ir}(\text{cod})\{(\text{MeIm}(\text{CH}_2)_3\text{OH})\}_2]\text{Cl}$  (**9**),  $m/z$  = 581.2468  $[\text{M}]^+$ .

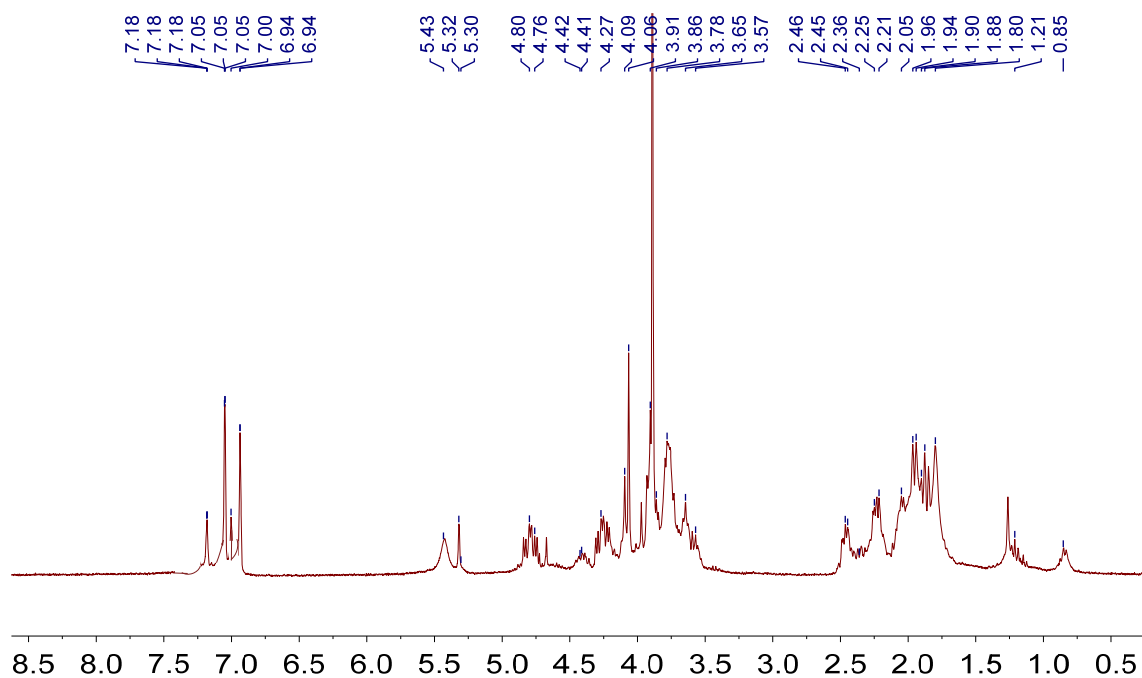

**Figure S27.** <sup>1</sup>H NMR of  $[\text{Ir}(\text{cod})\{(\text{MeIm}(\text{CH}_2)_3\text{OH})\}_2]\text{Cl}$  (**9**) ( $\text{CD}_2\text{Cl}_2$ , 298K).

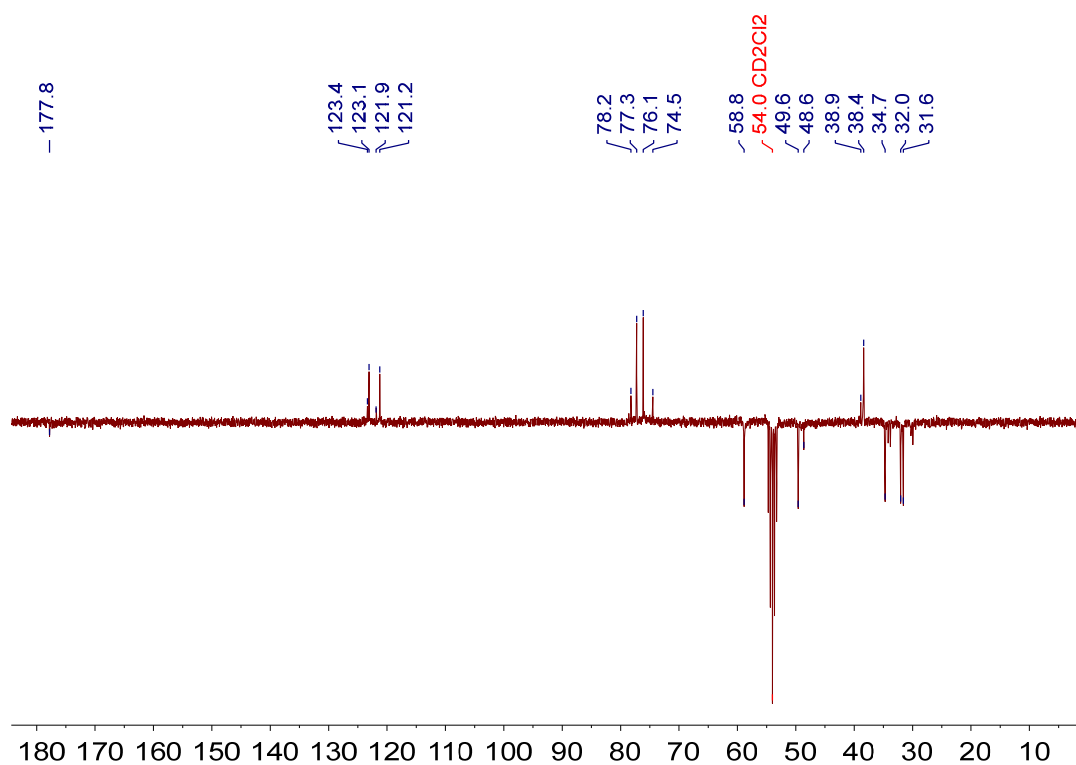

**Figure S28.**  $^{13}\text{C}\{^1\text{H}\}$ -APT NMR of  $[\text{Ir}(\text{cod})\{(\text{MeIm}(\text{CH}_2)_3\text{OH})_2\}\text{Cl}]$  (**9**) ( $\text{CD}_2\text{Cl}_2$ , 298K).

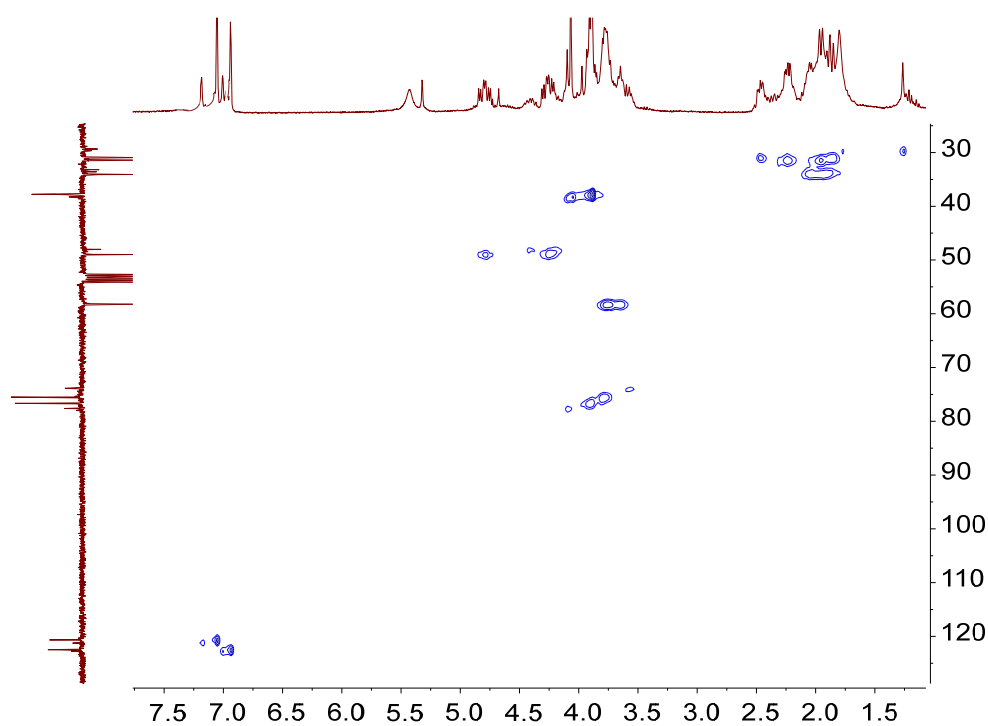

**Figure S29.**  $^1\text{H}, ^{13}\text{C}$ -HSQC NMR of  $[\text{Ir}(\text{cod})\{(\text{MeIm}(\text{CH}_2)_3\text{OH})_2\}\text{Cl}]$  (**9**) ( $\text{CD}_2\text{Cl}_2$ , 298K).

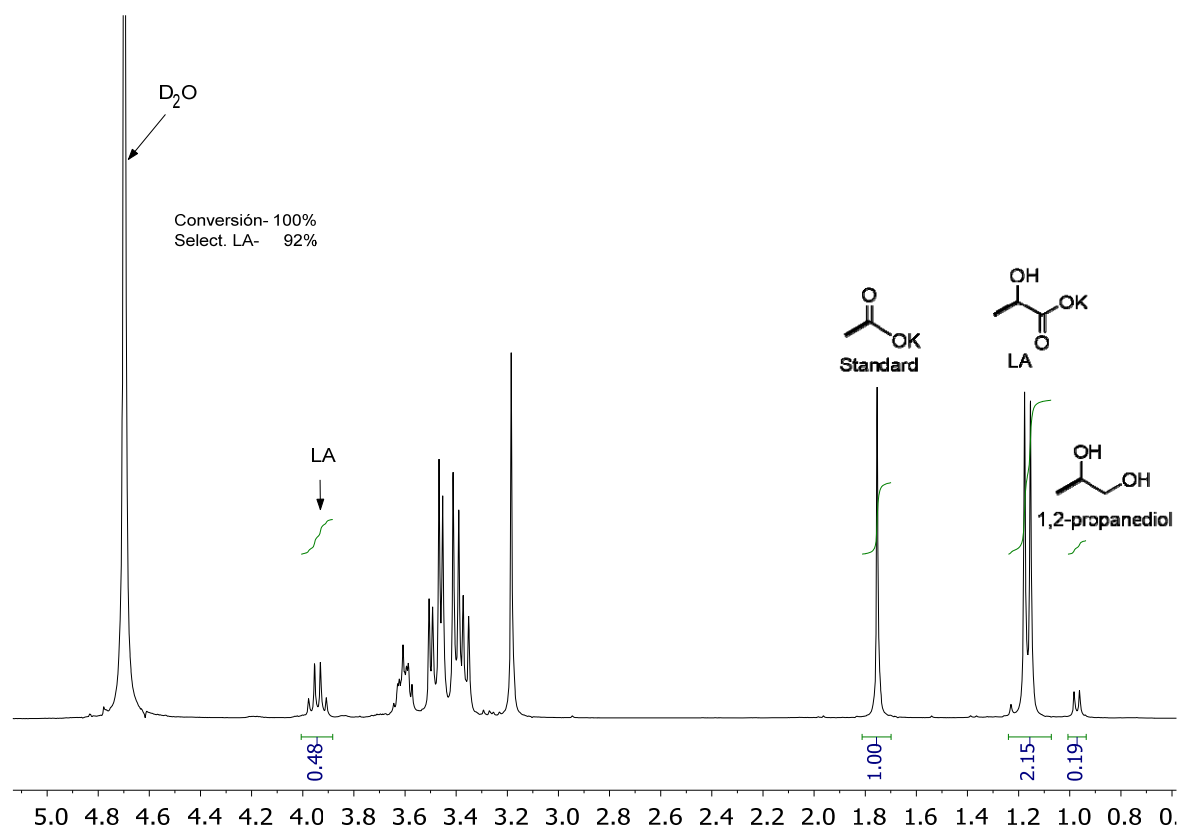

**Figure S30.**  $^1H$  NMR ( $D_2O$ , 298K) using NaOAc as internal standard for a catalysis test in the standard reaction conditions: glycerol (1 mL, 13.7 mmol), KOH (5 mmol) and iridium catalyst (0.2 mmol%). Conversion of glycerol, based on the theoretical maximum determined by the mmol of added base, potassium lactate (LA).
